# Supplementary material for: Racial and Ethnic Differences in Hospice Use Among Medicaid-Only and Dual-Eligible Decedents
Source: PubMed Central journal article supplement (PMC10709774; doi:10.1001/jamahealthforum.2023.4240), 2023-12-08
Supplement: jamahealthforum-e234240-s001.pdf [file jamahealthforum-e234240-s001.pdf]

## Data Sharing Statement

Robison. Racial and Ethnic Differences in Hospice Use Among Medicaid-Only and Dual-Eligible Decedents. *JAMA Health Forum*. Published December 08, 2023.  
doi:10.1001/jamahealthforum.2023.4240

### Data

**Data available:** No

### Additional Information

**Explanation for why data not available:** These data include Medicare claims data and are therefore protected under a data use agreement from sharing.
